# Supplementary material for: Theaflavin-3, 3′-Digallate Suppresses RANKL-Induced Osteoclastogenesis and Attenuates Ovariectomy-Induced Bone Loss in Mice
Source: PubMed Central journal article supplement (PMC7336999; doi:10.3389/fphar.2020.00803), 2020-06-29
Supplement: DataSheet_1.pdf [file DataSheet_1.pdf]

## Supplementary Material

**Table S1 Primer Sequences for RT-qPCR**

| Gene  | Sequence 5' to 3'         |                           |
|-------|---------------------------|---------------------------|
| GAPDH | F: GGGAAGCCCATCACCATCTT   | R: GCCTCACCCCATTTGATGTT   |
| TRAP  | F: ACGGCTACTTGCGGTTTCA    | R: TCCTTGGGAGGCTGGTCTT    |
| MMP-9 | F: GCTGACTACGATAAGGACGGCA | R: GCGGCCCTCAAAGATGAACGG  |
| CTSK  | F: GAAGAAGACTCACCAGAAGCAG | R: TCCAGGTTATGGGCAGAGATT  |
| Nrf2  | F: TCTTGAGTAAGTCGAGAAGTGT | R: GTTGAAACTGAGCGAAAAAGGC |
| HO-1  | F: GAGATAGAGCGCAACAAGCAG  | R: CTTGACCTCAGGTGTCATCTC  |
| CAT   | F: CCCCTATTGCCGTTTCGATTCT | R: TTCAGGTGAGTCTGTGGGTTT  |
| SOD   | F: CAGACCTGCCTTACGACTATGG | R: CTCGGTGGCGTTGAGATTGTT  |
| GPX1  | F: AGTCCACCGTGTATGCCTTCT  | R: GAGACGCGACATTCTCAATGA  |

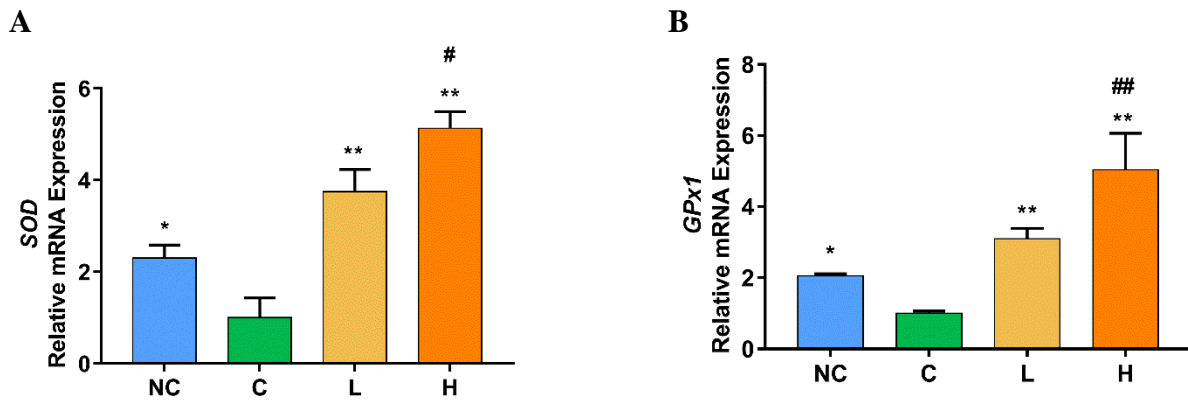

**Figure S1** TF3 enhanced the mRNA expression levels of *SOD* and *GPx1*. **(A)**The mRNA expression of *SOD*. **(B)**The mRNA expression of *GPx1*.  $n = 3$ , \* $P < 0.05$ , \*\* $P < 0.01$  compared with C group. # $P < 0.05$ , ## $P < 0.01$  compared with L group.

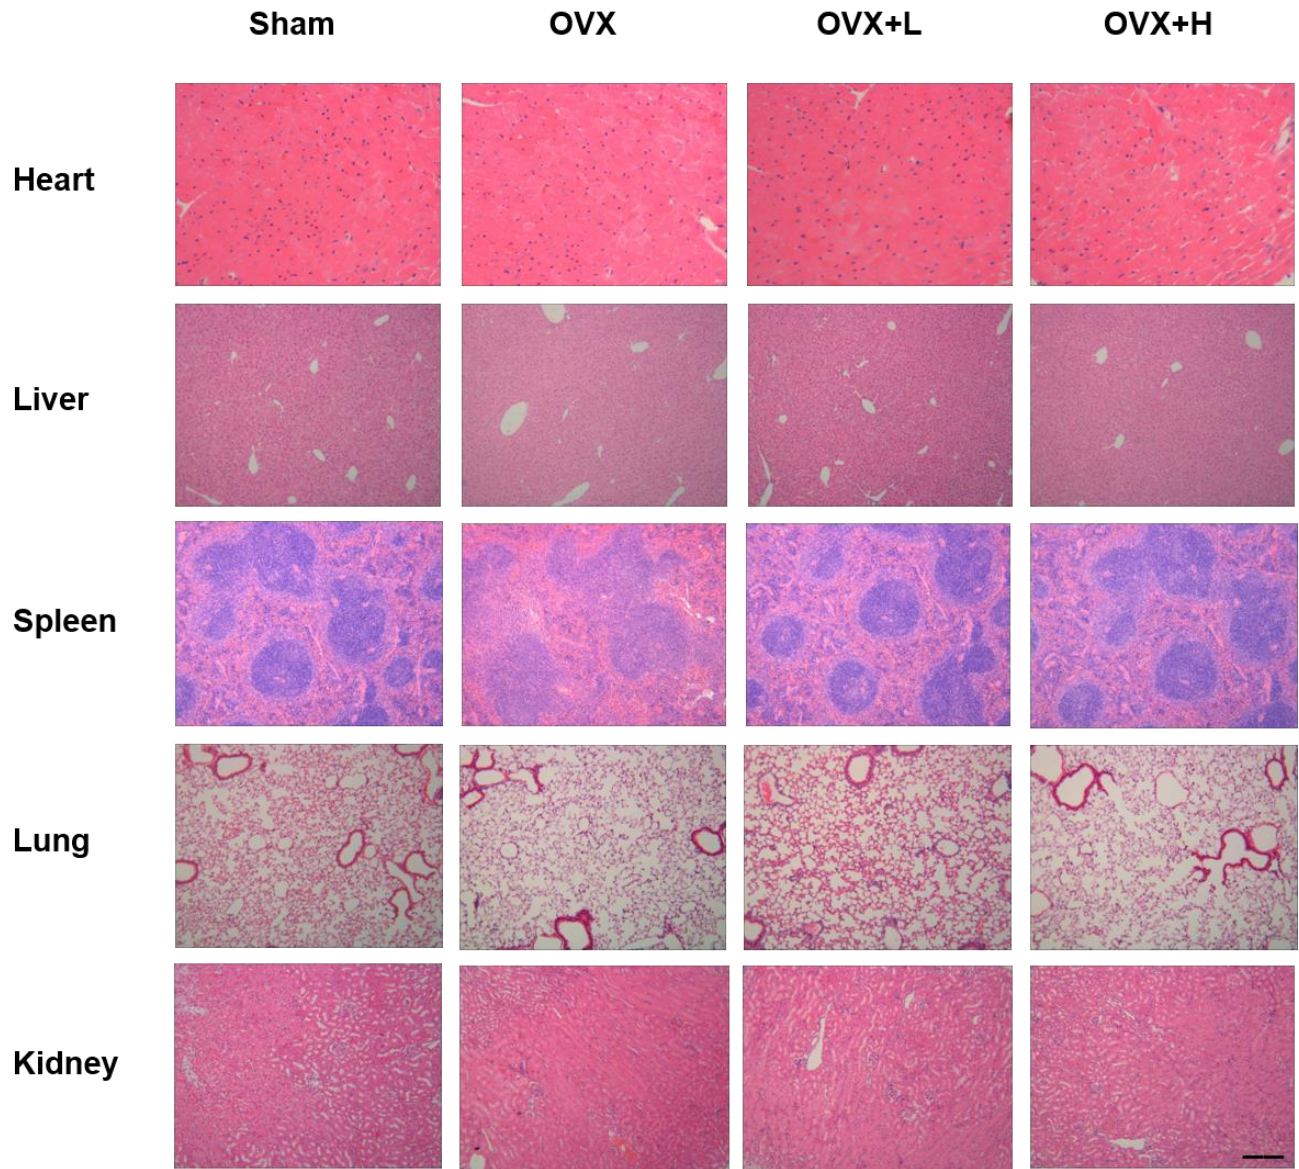

**Figure S2** TF3 did not lead to tissue damage in mice. Representative images of H&E staining of heart, liver, spleen, lung kidney of mice. Scale bar = 200  $\mu$ m.
